# Supplementary material for: Complete Mitochondrial DNA Diversity in Iranians
Source: PLoS One. 2013 Nov 14;8(11):e80673. doi: 10.1371/journal.pone.0080673 (PMC3828245; doi:10.1371/journal.pone.0080673)
Supplement: Table S4 — AMOVA results for populations of Iran, Caucasus, Anatolia, and Europe based on complete mtDNA variation. (XLS) [file pone.0080673.s008.xls]

## Sheet: Sheet1
Table S4. AMOVA results for populations of Iran, Caucasus, Anatolia, and Europe based on complete mtDNA variation.
Groups	Number of populations	Number of groups	Molecular variation
			Among populations			Among populations within groups			Among groups
			%	Fst	P	%	Fsc	P	%	Fct	P
No grouping (Iran)	3	1	98.47	0.01528	0.00000
No grouping (all populations)	10	1	98.12	0.01885	0.00000
Geographic_1	10	3	98.01	0.0199	0.00000	1.70	0.01701	0.00000	0.29	0.00291	0.07653
Geographic_2	10	5	97.99	0.0201	0.00000	1.52	0.01528	0.00000	0.49	0.00489	0.13050
Geographic_3	11	6	96.89	0.0311	0.00000	1.50	0.01527	0.00000	1.61	0.01605	0.04653
Linguistic_1	10	3	98.17	0.0182	0.00000	1.99	0.0199	0.00000	-0.17	-0.00166	0.48040
Linguistic_2	10	5	98.10	0.0190	0.00000	1.82	0.0182	0.00000	0.08	0.00083	0.36624
Linguistic_3	11	6	97.05	0.0295	0.00000	1.80	0.01818	0.00000	1.15	0.01155	0.15446
Geographic_1: Caucasus (Armenians_S, Azeris_S, Georgians_S); West Asia (Iranians_S, Turks_S, Persians, Qashqais, Azeris); Europe (Tatars, Sardinians).
Geographic_2: Caucasus (Armenians_S, Azeris_S, Georgians_S); Iran (Iranians_S, Persians, Qashqais, Azeris); Turkey (Turks_S); Europe (Sardinians); Volga-Ural region (Tatars).
Geographic_3: Caucasus (Armenians_S, Azeris_S, Georgians_S); Iran (Iranians_S, Persians, Qashqais, Azeris); Turkey (Turks_S); Europe (Sardinians); Volga-Ural region (Tatars); Inner_Mongolia (Buryats).
Linguistic _1 (Families): Indo-European (Armenians_S, Iranians_S, Sardinians, Persians), Altaic (Tatars, Turks_S, Azeris_S, Azeris, Qashqais), Kartvelian (Georgians_S).
Linguistic _2 (Groups): Indo-European_Armenian (Armenians_S), Indo-European_Indo-Iranian (Iranians_S, Persians), Indo-European_Italian (Sardinians); Altaic_Turkic (Tatars, Turks_S, Azeris_S, Azeris, Qashqais); Kartvelian_Georgian (Georgians_S).
Linguistic _3 (Groups): Indo-European_Armenian (Armenians_S), Indo-European_Indo-Iranian (Iranians_S, Persians), Indo-European_Italian (Sardinians); Altaic_Turkic (Tatars, Turks_S, Azeris_S, Azeris, Qashqais); Altaic_Mongolian (Buryats); Kartvelian_Georgian (Georgian_S).
The populations from Schönberg et al. (2011) labeled with “S” after underscore. Grouping of populations with significantly higher among group variation shown in bold.
